# Supplementary material
Source: PubMed Central journal article supplement (PMC7965137)
Supplement: 3828_table.pdf [file 3828_table.pdf]

**On-line Table: Characteristics of patients**

| Patient No. | Age (yr) | Initial NIHSS Score | Device      | Location  | Immediate Outcome |
|-------------|----------|---------------------|-------------|-----------|-------------------|
| 1           | 50       | 18                  | Aspiration  | Left M1   | Better            |
| 2           | 67       | 17                  | Aspiration  | Right ICA | Deceased          |
| 3           | 77       | n/a                 | Stentriever | Right ICA | Deceased          |
| 4           | 65       | 17                  | Stentriever | Left M1   | Deceased          |
| 5           | 75       | 4                   | Aspiration  | Right M1  | Better            |
| 6           | 79       | 20                  | Aspiration  | Left ICA  | Better            |
| 7           | 80       | 11                  | Aspiration  | Right ICA | Better            |
| 8           | 76       | 15                  | Aspiration  | Right ICA | Worse             |
| 9           | 49       | 16                  | Aspiration  | Right M1  | Deceased          |
| 10          | 81       | 24                  | Stentriever | Left ICA  | Deceased          |
| 11          | 55       | 15                  | Aspiration  | Left ICA  | Worse             |
| 12          | 81       | 26                  | Stentriever | Left M1   | Deceased          |
| 13          | 47       | n/a                 | Balloon     | Left M1   | Worse             |
| 14          | 63       | n/a                 | None        | n/a       | Same              |
| 15          | 57       | 13                  | Stentriever | Left M1   | Better            |
| 16          | 47       | 17                  | Aspiration  | Right M1  | Better            |
| 17          | 41       | n/a                 | Stentriever | Right M1  | Better            |
| 18          | 61       | 18                  | Stentriever | Right M1  | Better            |
| 19          | 72       | n/a                 | Aspiration  | Right M1  | Better            |
| 20          | 31       | 13                  | Aspiration  | Right M1  | Better            |
| 21          | 42       | 11                  | Stentriever | Right M1  | Better            |
| 22          | 67       | 13                  | Aspiration  | Right M1  | Deceased          |
| 23          | 69       | 4                   | Balloon     | Right M2  | Worse             |
| 24          | 72       | 7                   | Stentriever | Right M1  | Deceased          |
| 25          | 68       | 18                  | Aspiration  | Right ICA | Deceased          |
| 26          | 80       | 13                  | Stentriever | Left ICA  | Better            |
| 27          | 36       | 18                  | Stentriever | Left ICA  | Worse             |
| 28          | 66       | 22                  | Stentriever | Left M1   | Better            |
| 29          | 67       | 17                  | Stentriever | Right M1  | Better            |
| 30          | 65       | 16                  | Balloon     | Left M2   | Better            |
| 31          | 57       | n/a                 | Stentriever | Left M1   | Deceased          |
| 32          | 62       | n/a                 | n/a         | Left M1   | Same              |

**Note:**—n/a indicates not available.
